# Supplementary material
Source: PubMed Central journal article supplement (PMC2390730)
Supplement: tpc.108.058503_2.pdf [file tpc.108.058503_2.pdf]

## Supplemental Figure 2

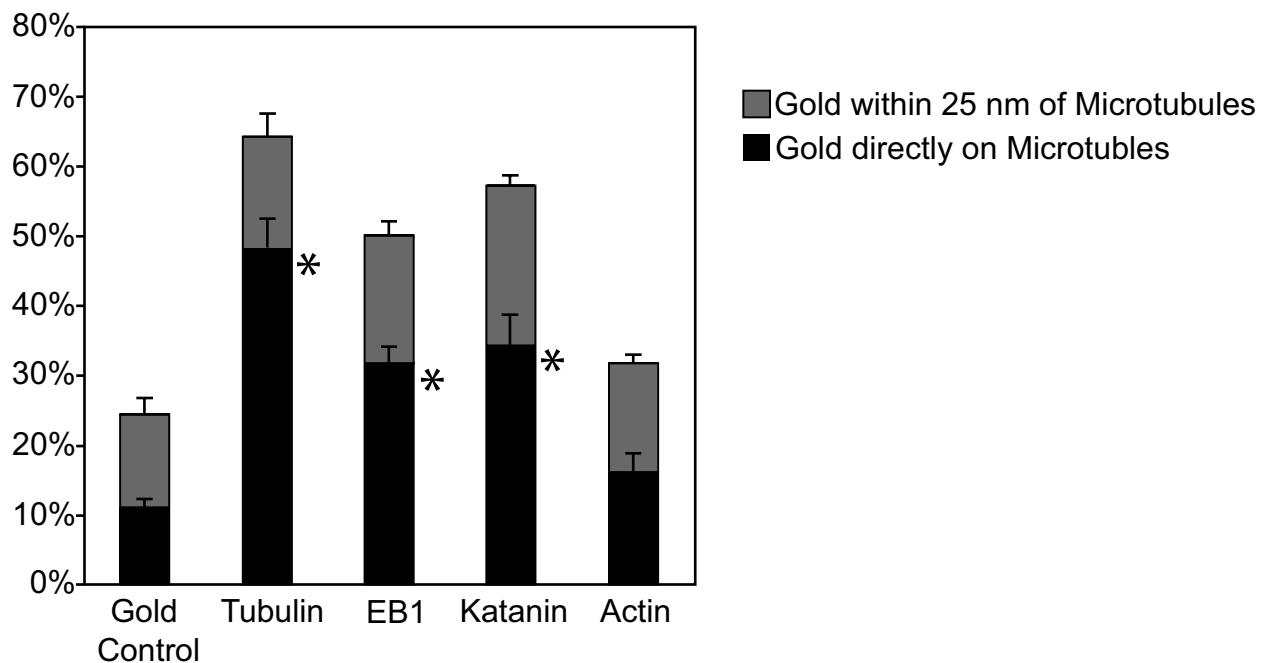

### Supplemental Figure 2.

The average percentage distribution of secondary antibody gold particles within cells treated with different primary antibodies. The percentage of gold particles directly on microtubules was statistically significantly greater ( $p < 0.05$ ) in cells treated with anti-tubulin, anti-EB1 or anti-katanin when compared to cells of the FluoroNanogold® only control as indicated with \*. The percentage of gold particles on microtubules of cells treated with anti-actin was not statistically significantly different from the FluoroNanogold® control. The percentage of gold particles within 25 nm of microtubules was generally constant between treatments. Standard error bars are included for every data set.

# Supplemental Figure 3

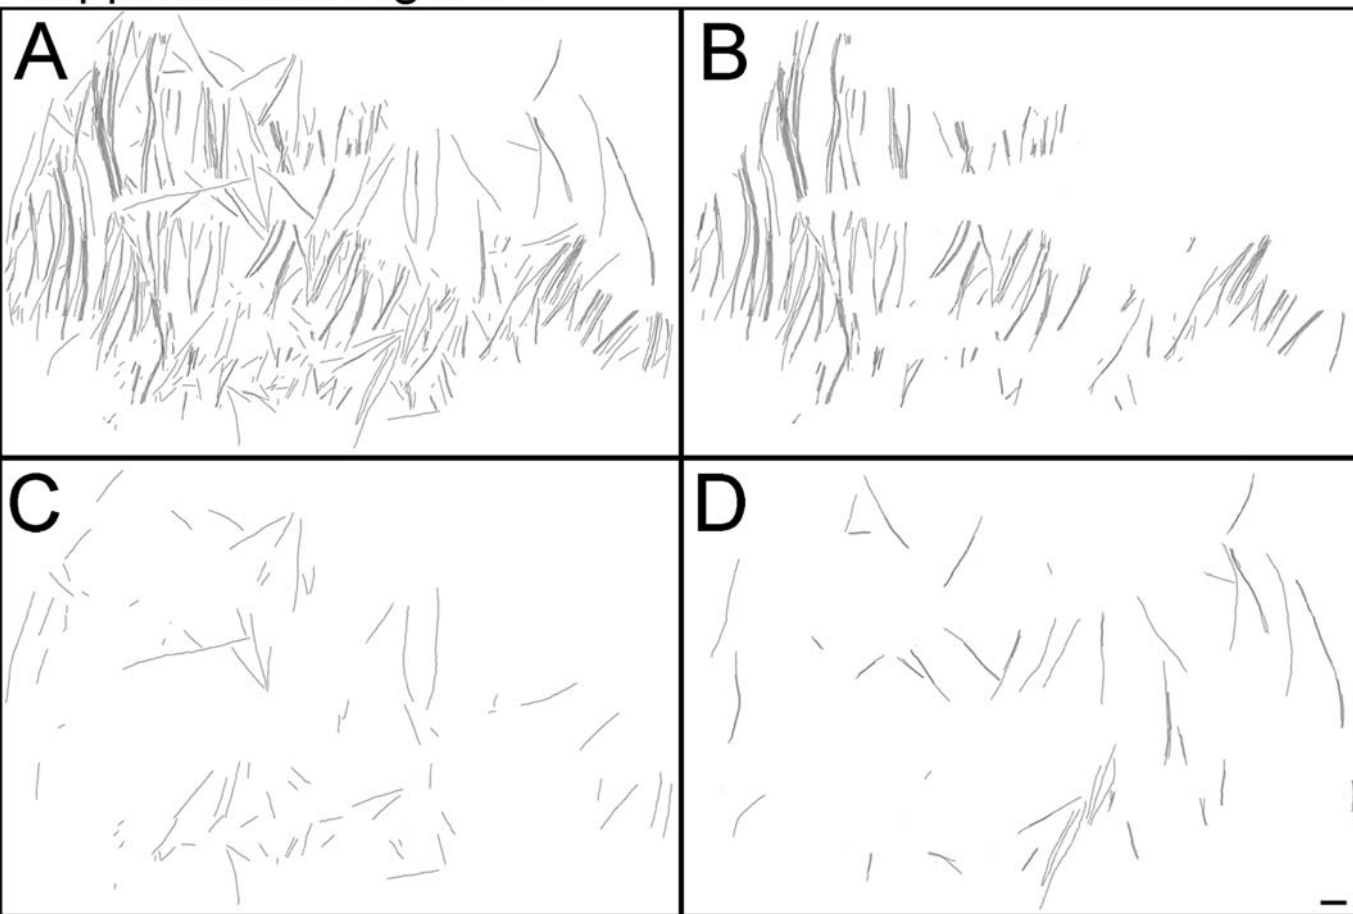

Supplemental Figure 3.

The four modified tracings of Montage 1 used for analysis. (A) Lines representing microtubules that crossed the paths of others were digitally cut from their original position (Supplemental Figure 1C) and placed in regions not covered by other microtubules. The orientation of these microtubules was not altered. The lines representing underlying microtubules were linked. (B) The modified tracing of all bundled microtubules within the montage. (C) The modified tracing of all solitary discordant microtubules within the montage. (D) The modified tracing of all bundled discordant microtubules within the montage. Scale bar =1  $\mu\text{m}$ .
